# Three-dimensional imaging of the atrial septum and patent foramen ovale anatomy: defining the morphological phenotypes of patent foramen ovale

Bushra S. Rana<sup>1</sup>, Len M. Shapiro<sup>1</sup>, Karen P. McCarthy<sup>2</sup>, and Siew Yen Ho<sup>2\*</sup>

<sup>1</sup>Department of Cardiology, Papworth Hospital NHS Foundation Trust, Cambridge, UK; and <sup>2</sup>Cardiac Morphology Unit, Royal Brompton and Harefield NHS Foundation Trust, and Imperial College, Sydney Street, London SW3 6LY, UK

Received 9 September 2010; accepted after revision 9 September 2010

Patent foramen ovale (PFO) is known to occur with greater prevalence in those with cryptogenic stroke. These observations support the role of a PFO as a channel for paradoxical embolism and a mechanism for cerebral ischaemic events. Transcatheter closure of PFO may be indicated in this setting. A prerequisite of procedural success is achieving complete closure of the shunt. Studies have shown a varying degree of successful shunt closure. Residual shunts are usually the result of a mismatch between the device shape and PFO anatomy. In this article, we review the features of PFO and their surrounding structures as seen by three-dimensional transoesophageal echocardiography in patients undergoing transcatheter closure and relate these to the variations in morphology on anatomical specimens for a better appreciation of their suitability for closure devices. The salient features of the anatomical variations seen in adults undergoing transcatheter device closure have been summarized and used to produce a practical pre-procedural checklist.

## Keywords

Patent foramen ovale • Anatomy • Three-dimensional echocardiography • Transoesophageal echocardiography

## Introduction

Patent foramen ovale (PFO) is known to occur with greater prevalence in those with cryptogenic stroke.<sup>1–3</sup> This association is more pronounced in the young.<sup>4</sup> These observations support the role of a PFO as a channel for paradoxical embolism, a mechanism for cerebral ischaemic events. Transcatheter closure of PFO is indicated in this setting, where no other cause including cardiovascular risk factors is found, and a PFO is thought to be a likely contributor. This technique is associated with a high success rate, low incidence of procedural and in-hospital complications, and excellent results on long-term follow-up.<sup>5–7</sup>

A prerequisite of procedural success is achieving complete closure of the shunt. Studies have shown a varying degree of successful shunt closure in the intermediate-to-longer term, ranging from 73,<sup>6</sup> 78,<sup>8</sup> 86<sup>5</sup> to 100%.<sup>7</sup> However, the cause of the residual shunt is not clear from the literature. A greater incidence of residual shunting post-procedure has been reported in those with a concomitant atrial septal aneurysm.<sup>9,10</sup> We have reported previously on the morphological features of the PFO,<sup>11</sup> but there

are no publications on detailed assessments of the anatomy of the device post-implantation. In our experience, residual shunts are usually the result of a mismatch between the device shape and PFO anatomy. Three-dimensional transoesophageal echocardiography (3D TEE) has revolutionized our ability to understand the anatomy of the atrial septum and PFO morphology in real time. In this article, we review the features of PFO and their surrounding structures as seen by three-dimensional transoesophageal echocardiography in patients undergoing transcatheter closure and relate these to the variations in morphology on anatomical specimens for a better appreciation of their suitability for closure devices.

## Anatomy of the atrial septum and patent foramen ovale

The PFO is persistence of the foetal interatrial communication at the site of the embryonic ostium secundum. In foetal life, blood from the inferior caval vein is directed preferentially to the

\* Corresponding author. Tel: +44 207 351 8751; fax: +44 207 351 8230, Email: yen.ho@rbht.nhs.uk

Published on behalf of the European Society of Cardiology. All rights reserved. © The Author 2010. For permissions please email: journals.permissions@oxfordjournals.org.

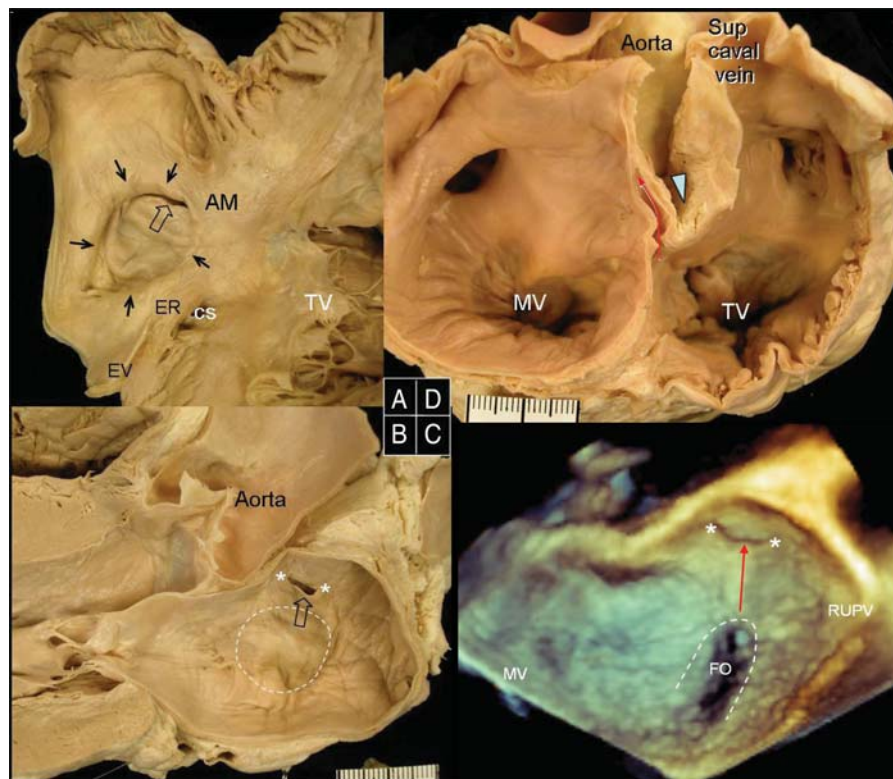

**Figure 1** Long tunnel patent foramen ovale. (A) and (B) are right and left atrial views of the septal aspect of the same heart showing a patent foramen ovale (open arrow). The right atrial aspect is characterized by the muscular rim (black arrows), whereas the left atrial aspect is flat with a crescentic opening (between asterisks). The Eustachian valve (EV), Eustachian ridge (ER), and aortic mound (AM) are features of the right atrium. Broken line corresponds to the muscular rim around the fossa on the right atrial side. (C) Three-dimensional transoesophageal echocardiography image of left atrium showing an enface view of the atrial septum. Asterisks show opening of patent foramen ovale into left atrium. Red arrow shows course of patent foramen ovale tunnel beginning at the superior aspect of fossa ovalis (FO) from the right atrial aspect and running upwards and opening into the roof of the left atrium. (D) This cross-sectional view of the atrial septum shows the tunnel of the patent foramen ovale (red arrow) passing between the infolding (triangle) of the right atrial wall (septum secundum) and the flap valve of the fossa (septum primum). MV, mitral valve; RUPV, right upper pulmonary vein; TV, tricuspid valve.

foramen ovale by the Eustachian valve. The septum primum (primary septum), which forms the floor of the oval fossa is like a flap that is large enough to overlap the rim (or limbus) formed by the septum secundum (secondary septum). The latter is an infolding of the atrial wall on the right atrial side that gives the fossa a raised margin. Thus, the right atrial aspect of the septum is characterized by the rim, which is lacking on the left atrial side (Figure 1). The overlap of the flap against the rim allows the foramen ovale to be closed at birth upon increase in left atrial pressure. Soon after, there is adherence of the flap valve to the rim and usually adhesion is complete by the first year of life resulting in total obliteration of the foetal communication. However, a gap, the PFO, persists in the antero-superior margin in 25–35% of hearts examined at routine autopsy.<sup>12</sup> Since the flap valve is larger than the fossa, the length of the overlap can be considerable, resulting in a tunnel-like PFO, especially if the width of the channel is narrow (Figure 1). Our small series of heart specimens showed a length of 1–6 mm and widths of 5–13 mm along the curve of the rim.<sup>11</sup> Taking the PFO to be of tunnel-like configuration, the right atrial entrance is bordered by the firm antero-superior rim of the

fossa, which is the muscular fold while the posterior border is the pliable and thin flap valve. Its left atrial entrance is marked by the crescentic free edge of the embryonic septum primum. The opening is located close to the antero-superior wall of the left atrium (Figure 1B). This proximity should be borne in mind, especially when attempting to negotiate a catheter through a long and narrow tunnel which, in addition, may be meandering. The risk of exiting the heart is particularly relevant because this part of the atrial wall may be exceptionally thin.<sup>13,14</sup>

For overall approach to the atrial septum as viewed from the right atrial aspect, the septum appears extensive at first sight. In reality, the true septum is the floor of the fossa ovalis and its immediate muscular rim.<sup>15</sup> Of note to interventionists is the extensive anterior margin, which includes the aortic mound that overlies the aortic root on the epicardial side.<sup>16</sup> The size and location of the fossa ovalis varies from heart to heart.<sup>17</sup> The prominence of its rim also varies. A flat rim blending with the fossa flap occurs in nearly 20% of hearts.<sup>18</sup> The flap valve is usually a thin fibromuscular sheet, 0.5–1.5 mm thick, rather taut against the fossa margin. Occasionally, there are one or several fenestrations in

the flap. These are deficiencies of the septum primum, or oval fossa defects, rather than so-called secundum atrial septal defects. The entire flap can also be redundant and aneurysmal with a tendency to be associated with a large fossa. The infolded rim is filled with epicardial fat to varying thicknesses. In young adults the upper limit of normal fat deposit is defined as 1.5 cm in transverse dimension, not to be mistaken for lipomatous septal hypertrophy.<sup>19</sup>

The orifice of the inferior caval vein is located inferiorly and posteriorly relative to the fossa. It is guarded by the Eustachian valve, which is usually shaped like a crescentic flap of varying heights. The medial insertion of the Eustachian valve toward the cardiac septum is to the Eustachian ridge (sinus septum) that, in turn, continues to the antero-inferior rim of the fossa. Thus, it is conceivable that a prominent flap-like Eustachian valve and ridge can guide flow toward the foramen ovale. In approximately 2% of hearts, the Eustachian valve is large and fenestrated. Rarely, it is an extensive Chiari network. Although not readily visualized on imaging, the network can be entangled during catheter manoeuvres.

## Important considerations when assessing PFO anatomy for device closure

Description of anatomy is necessary such that a clear perception of the defect is then possible. This will enable the operator to understand how the defect will or is likely to behave once a percutaneous closure device is deployed through it. There are several types of device available and each has its range of sizes (including Amplatzer<sup>®</sup> PFO occluder (AGA Medical Corporation), Helix<sup>®</sup> septal occluder (W.L.Gore and Associates, Inc.), BioSTAR<sup>®</sup> (NMT Medical, Inc.), Solysafe device<sup>®</sup> (Swissimplant<sup>®</sup>) and Premere<sup>™</sup> PFO closure system (St Judes)). The aim is to achieve complete closure of the defect so that no right to left shunting remains. The complexity of the PFO anatomy can result in a device position that in fact causes the defect to remain patent and shunting may even be greater than prior to device placement. If at the outset the anatomical description can be precisely understood, it is our belief that such procedure failure could be avoided.

A detailed assessment of the PFO is performed with transoesophageal echocardiography.<sup>20</sup> This assessment is pivotal in deciding the suitability of the defect for device closure. As our clinical experience in imaging PFO and the atrial septum with 3D TEE grows, previous undefined anatomical variations become apparent. Indeed, real-time 3D TEE has brought with it a new era, where, in life, with a blood-filled beating heart the reality of the atrial septum and its neighbouring structures are appreciated. How this impacts on the shape of the defect and issues surrounding its closure, with a percutaneous device, become evident, in a way not appreciated previously. Thus, what is now needed is a detailed understanding of the variation in the types of anatomy. This is best achieved by categorizing these differences. The types of defects possible can be broadly grouped into simple and complex. A simple PFO usually can be closed with most standard devices. Essentially a PFO falls into this group by excluding specific characteristics that, if present, are considered 'complex' and require special

**Table 1** Categories of patent foramen ovale

| PFO category | Anatomical characteristics                                                                                                                                                                                             |
|--------------|------------------------------------------------------------------------------------------------------------------------------------------------------------------------------------------------------------------------|
| 1. Simple    | Standard anatomy, i.e. none of the below                                                                                                                                                                               |
| 2. Complex   | Long tunnel length ( $\geq 8$ mm)<br>Multiple openings into left atrium<br>Atrial septal aneurysm<br>Hybrid defect<br>Thick secondary septum ( $\geq 10$ mm)<br>Eustachian ridge<br>Eustachian valve or Chiari network |

consideration of the most suitable type and size of device necessary to achieve long-term closure. Table 1 summarizes these characteristics.

## Defining the morphological phenotypes in the context of suitability for device closure

### Simple PFO

This is a standard PFO with tunnel length  $< 8$  mm, without an atrial septal aneurysm, without a large Eustachian ridge or valve, without a thickened secondary septum (septum secundum), i.e.  $< 10$  mm, and without other defects of the fossa ovalis (see below). Most types of devices will be suitable for this type of PFO. If all other features listed above are not present except the orifice opening(s) are  $> 10$  mm then consideration to the size of device, usually a larger device, will be needed.

### Complex PFO

#### PFO with a long tunnel length, usually $> 8$ mm

Tunnel length of a PFO, if more than or equal to 8 mm usually causes a device with a short waist (i.e. most device types) to sit in the defect partially unfolded. This is the case particularly if the tunnel is narrow in addition to being long. Even when the tunnel is wide but with relatively rigid margins, i.e. the primary septum (septum primum) of the fossa ovalis is not aneurysmal, then its length becomes important in the choice of device (Figure 2). By 'aneurysmal' we mean thin, excessively mobile and redundant tissue where the overlapping valve tissue can be 'bunched up', so not necessarily causing such an issue.

#### Multiple openings of PFO on left atrial side

We have observed a number of PFO's, which have multiple openings (of a PFO) into the left atrium. This is created by a strand of tissue of the primary septum being 'stuck down' (or tethered) to the secondary septum at the point of its opening into the left atrium causing two separate orifices (Figure 3). The morphology is not easily appreciated on 2D TEE imaging. It becomes relevant if one is to ensure both orifices have been covered by a device placed through one of the openings, and the defect(s) completely sealed.



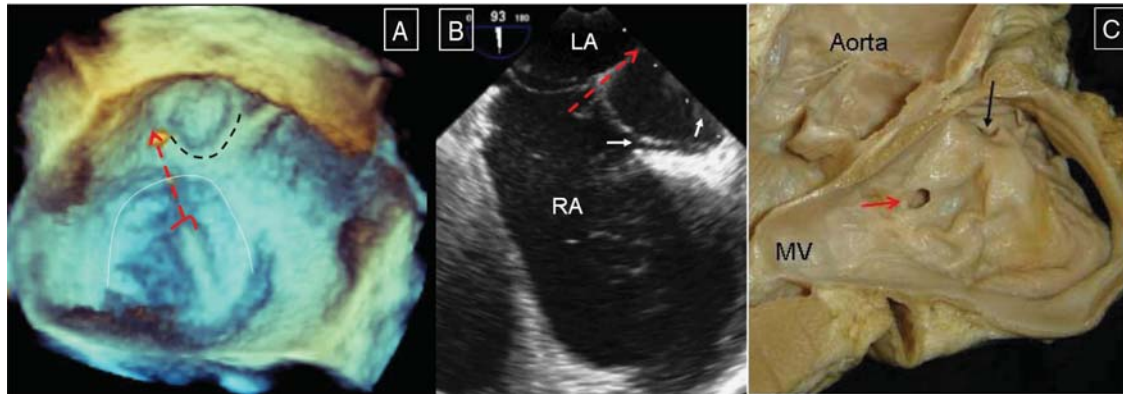

**Figure 4** Hybrid defect. (A) Three-dimensional transoesophageal echocardiography enface view of atrial septum viewed from left atrium and (B) two-dimensional transoesophageal echocardiography image. The fossa ovalis (demarcated by white line) has redundant aneurysmal tissue, a guidewire (red dotted arrow) has entered the left atrium through a small fenestration, of which there are several, in the fossa ovalis. A PFO is also present, its opening into the left atrium is demarcated in (A) by the dotted black line and in (B) by white arrows. (C) This left atrial aspect of an aneurysmal fossa valve shows the PFO opening (black arrow) and another defect (red arrow). LA, left atrium; MV, mitral valve; RA, right atrium.

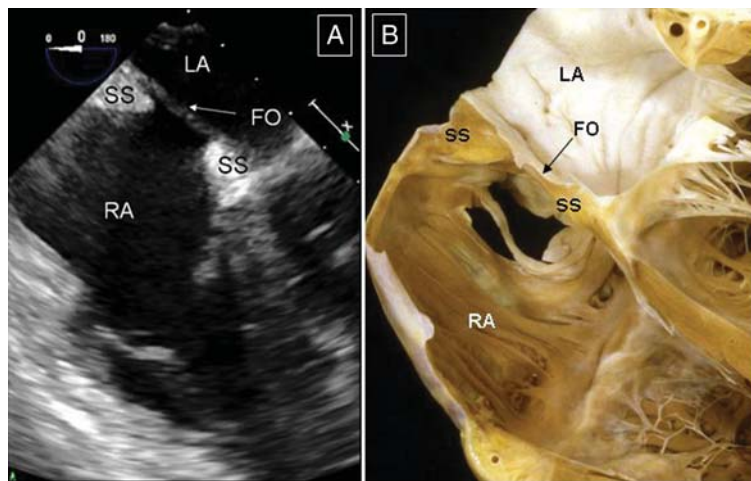

**Figure 5** Thick secondary septum. (A) Two-dimensional transoesophageal echocardiography image shows a thickened secondary septum (SS), measuring 11 mm. (B) A heart section in similar orientation shows fatty tissues filling the infolding of the SS. FO, fossa ovalis; LA, left atrium; RA, right atrium.

from the fossa ovalis. The disc may rest on the Eustachian ridge and result in the PFO tunnel being held open and a residual shunt remaining. In addition, attachment of primary septum on the left atrial side may be under tension (presumed to be a result of the ER pulling on the atrial septum) such that it is held away from secondary septum with a persistently open PFO. A very careful assessment on 2D TEE imaging is needed if 3D TEE is not available. In our experience 3D is needed to accurately assess how such a structure will impact on device choice and size.

#### Presence of Eustachian valve (or Chiari network)

Excessive redundant tissue may attach to the Eustachian ridge and guard the inferior vena cava (IVC) orifice. This Eustachian

valve has the potential to interfere with device placement. Passing the guidewire may be difficult. The Eustachian valve can become caught in the device during deployment and this may interfere with the device position or pose an embolic risk if drawn across the septum into the left atrium. A Chiari network, although rare, is usually more extensive and will present similar concerns.

### Pre-procedural checklist

Practical approach to describing atrial septum characteristics for suitability to device closure is suggested below, see also *Figure 2*. Essentially we propose a pre-procedural checklist.
